# Supplementary material for: Utility of the monocyte to lymphocyte ratio in diagnosing latent tuberculosis among HIV-infected individuals with a negative tuberculosis symptom screen
Source: PubMed Central journal article supplement (PMC7652277; doi:10.1371/journal.pone.0241786), 2020-11-09
Supplement: pone.0241786.s001.pdf [file pone.0241786.s001.pdf]

# MAKERERE

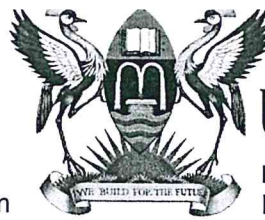

# UNIVERSITY

P.O. Box 7072 Kampala, Uganda  
E-mail: biomedicalresearch62@gmail.com

Phone: 256752575050  
Fax: 256 414 532204

**COLLEGE OF HEALTH SCIENCES  
SCHOOL OF BIOMEDICAL SCIENCES  
RESEARCH AND ETHICS COMMITTEE**

20<sup>th</sup> July 2020

SBS-794

To Mr. Mayito Jonathan  
Principal Investigator  
Infectious Diseases Institute

**Category of review**

- Initial review  
 Continuing review  
 Amendment  
 Termination of study  
 SAEs

**Decision of the School of Biomedical Sciences Research and Ethics Committee (SBS-REC) at its 100<sup>th</sup> REC meeting held on 25<sup>th</sup> June 2020.**

In the matter concerning the review of a proposal entitled, “Utility of the monocyte ratiom in diagnosing latent TB and HIV- infected individuals with a negative TB symptom screen.” SBS-REC - 794

The investigators have met all the requirements as stated by SBS-REC and therefore, the proposal is **APPROVED**.

The approval granted includes all materials submitted by the investigators for SBS-REC review including;

1. Protocol version 1.4 of 15/07/2020
2. English participation informed consent form of 15/07/2020
3. Luganda participation informed consent form of 15/07/2020
4. Case Report forms (phase 1 and 2) version 1.3 of 3/05/2020

and is valid until **24<sup>th</sup> June 2021**

Please note that the annual report and the request for renewal where applicable, should be submitted six weeks before expiry date of approval.

Any problems of a serious nature related to the execution of the research protocol should be promptly reported to the SBS-REC, and any changes to the research protocol should not be implemented without approval from SBS-REC, except when necessary to eliminate apparent immediate hazards to the research participant(s).

You are required to register the research protocol with the Uganda National Council for Science and Technology (UNCST) for final clearance to undertake the study in Uganda.

Signed.....

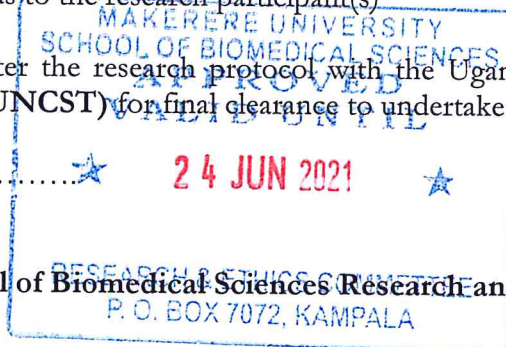

Dr. Jackson Mukonzo

Vice Chairperson, School of Biomedical Sciences Research and Ethics Committee.
